# Supplementary material
Source: PubMed Central journal article supplement (PMC5791889)

Supplementary Fig.1: Further representative sections of normal right kidney (RK) and tumor tissues were subjected to immunohistochemical analysis for NRF2

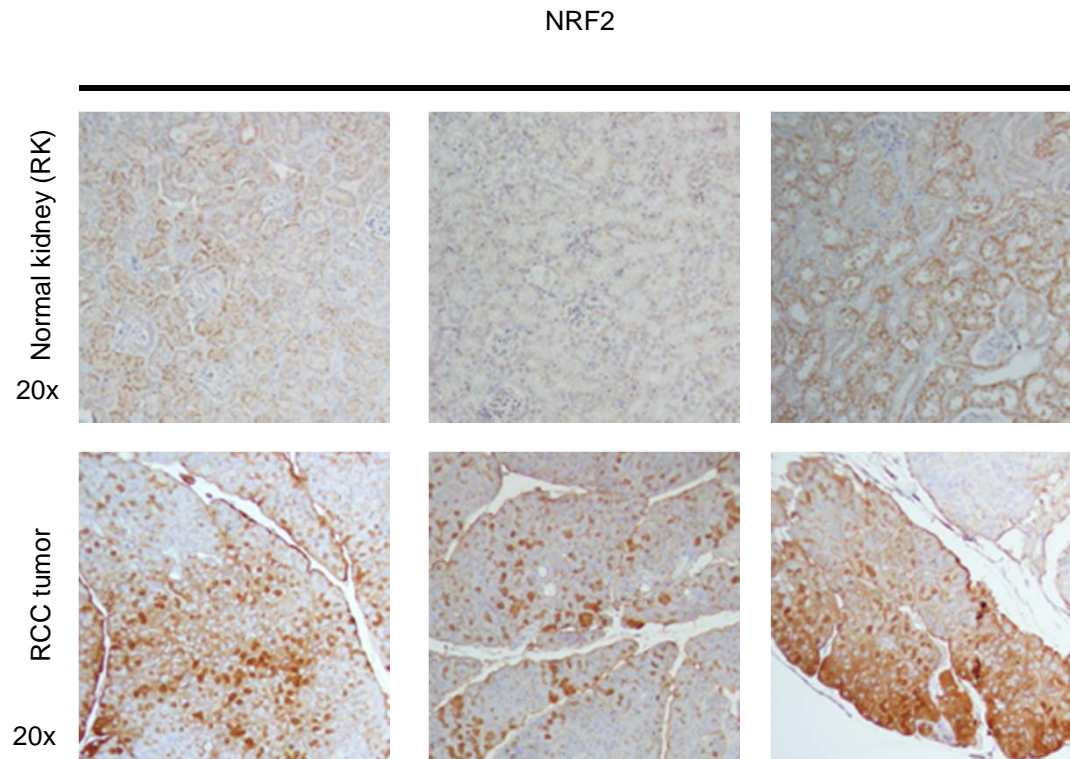

Supplement: NIHMS911884-supplement-1.pdf [file NIHMS911884-supplement-1.pdf]
