# Supplementary material
Source: PubMed Central journal article supplement (PMC5791889)

# Supplementary Fig.2: Glucose (Glu), glutamine (Gln), glutathione (GSH), and cell viability in RCC cells

A

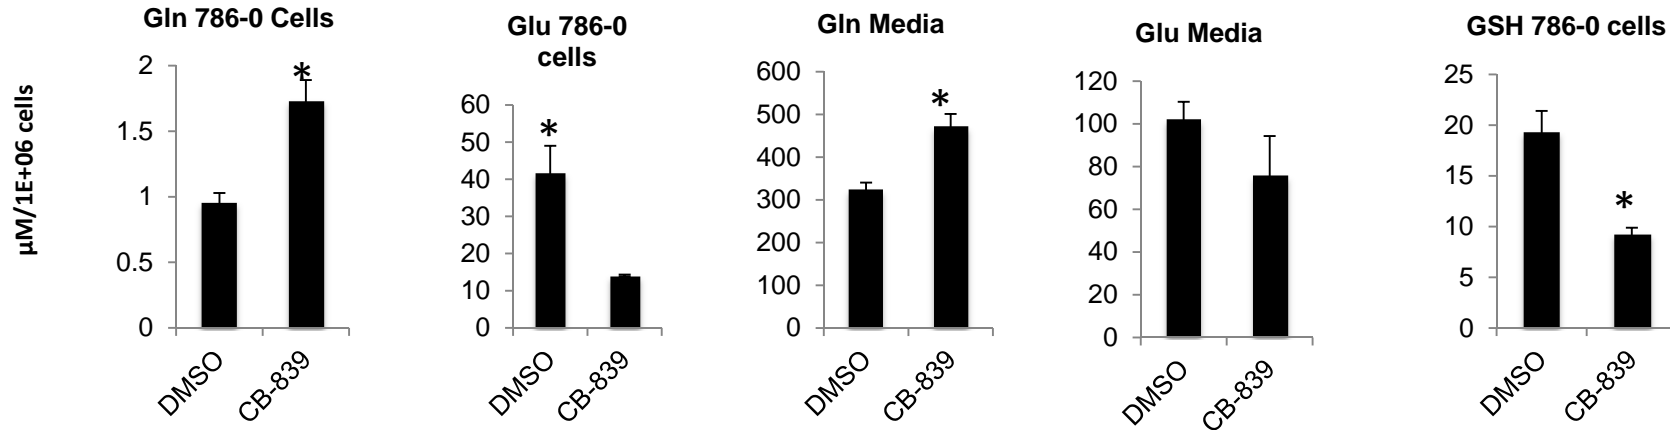

B

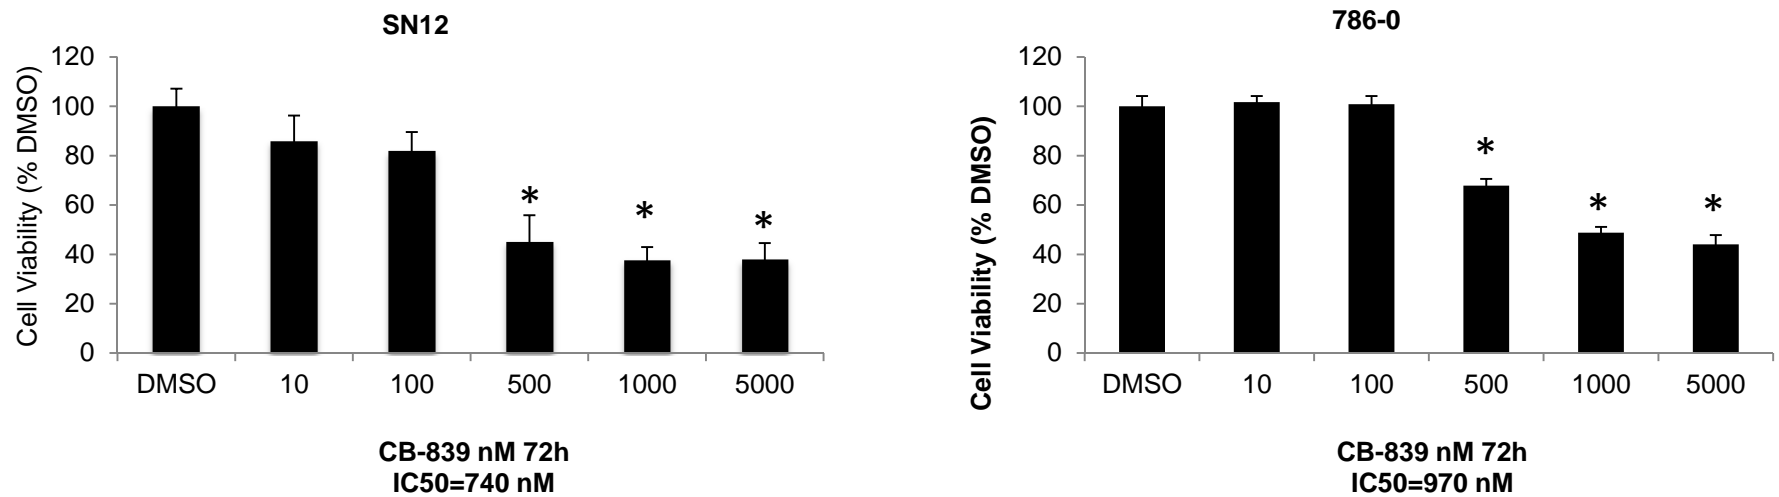

Supplement: NIHMS911884-supplement-2.pdf [file NIHMS911884-supplement-2.pdf]
