# Supplementary material
Source: PubMed Central journal article supplement (PMC5791889)
Supplement: NIHMS911884-supplement-3.pdf [file NIHMS911884-supplement-3.pdf]

# Supplementary Fig.3: Apoptosis flow data

## SN12 cells

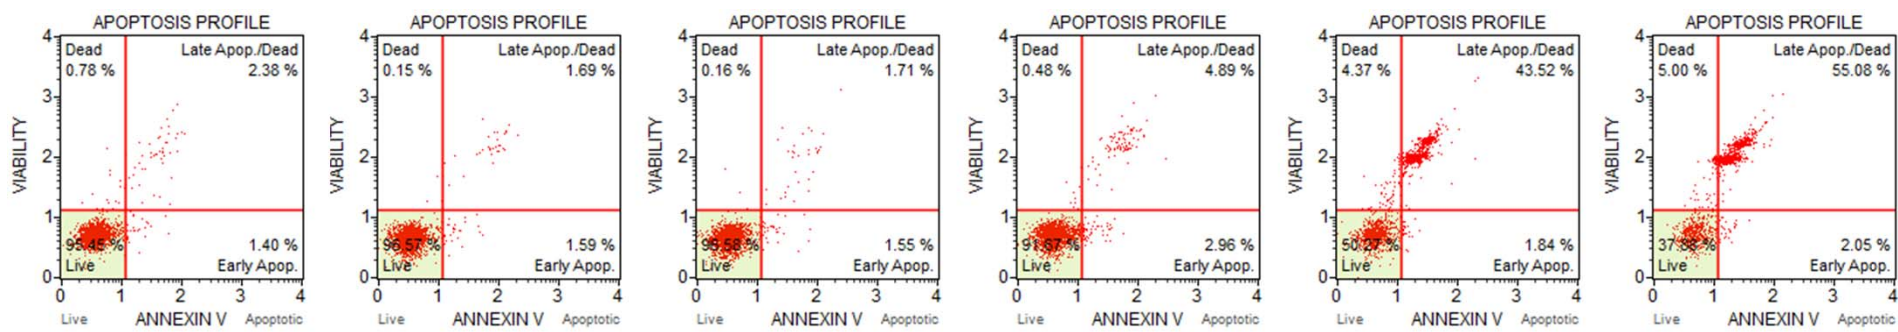

|                   |             |             |             |             |              |              |
|-------------------|-------------|-------------|-------------|-------------|--------------|--------------|
| DMSO              | +           | +           | +           | +           | +            | +            |
| CB-839<br>μM      | 0           | 1           | 5           | 0           | 1            | 5            |
| H2O2<br>μM        | 0           | 0           | 0           | 500         | 500          | 500          |
| % Total Apoptosis | <b>3.77</b> | <b>3.28</b> | <b>3.26</b> | <b>7.85</b> | <b>45.36</b> | <b>57.12</b> |
