# Supplementary material
Source: PubMed Central journal article supplement (PMC5791889)

Supplementary Fig.4: Bioluminescence imaging, measurements, and animal weights

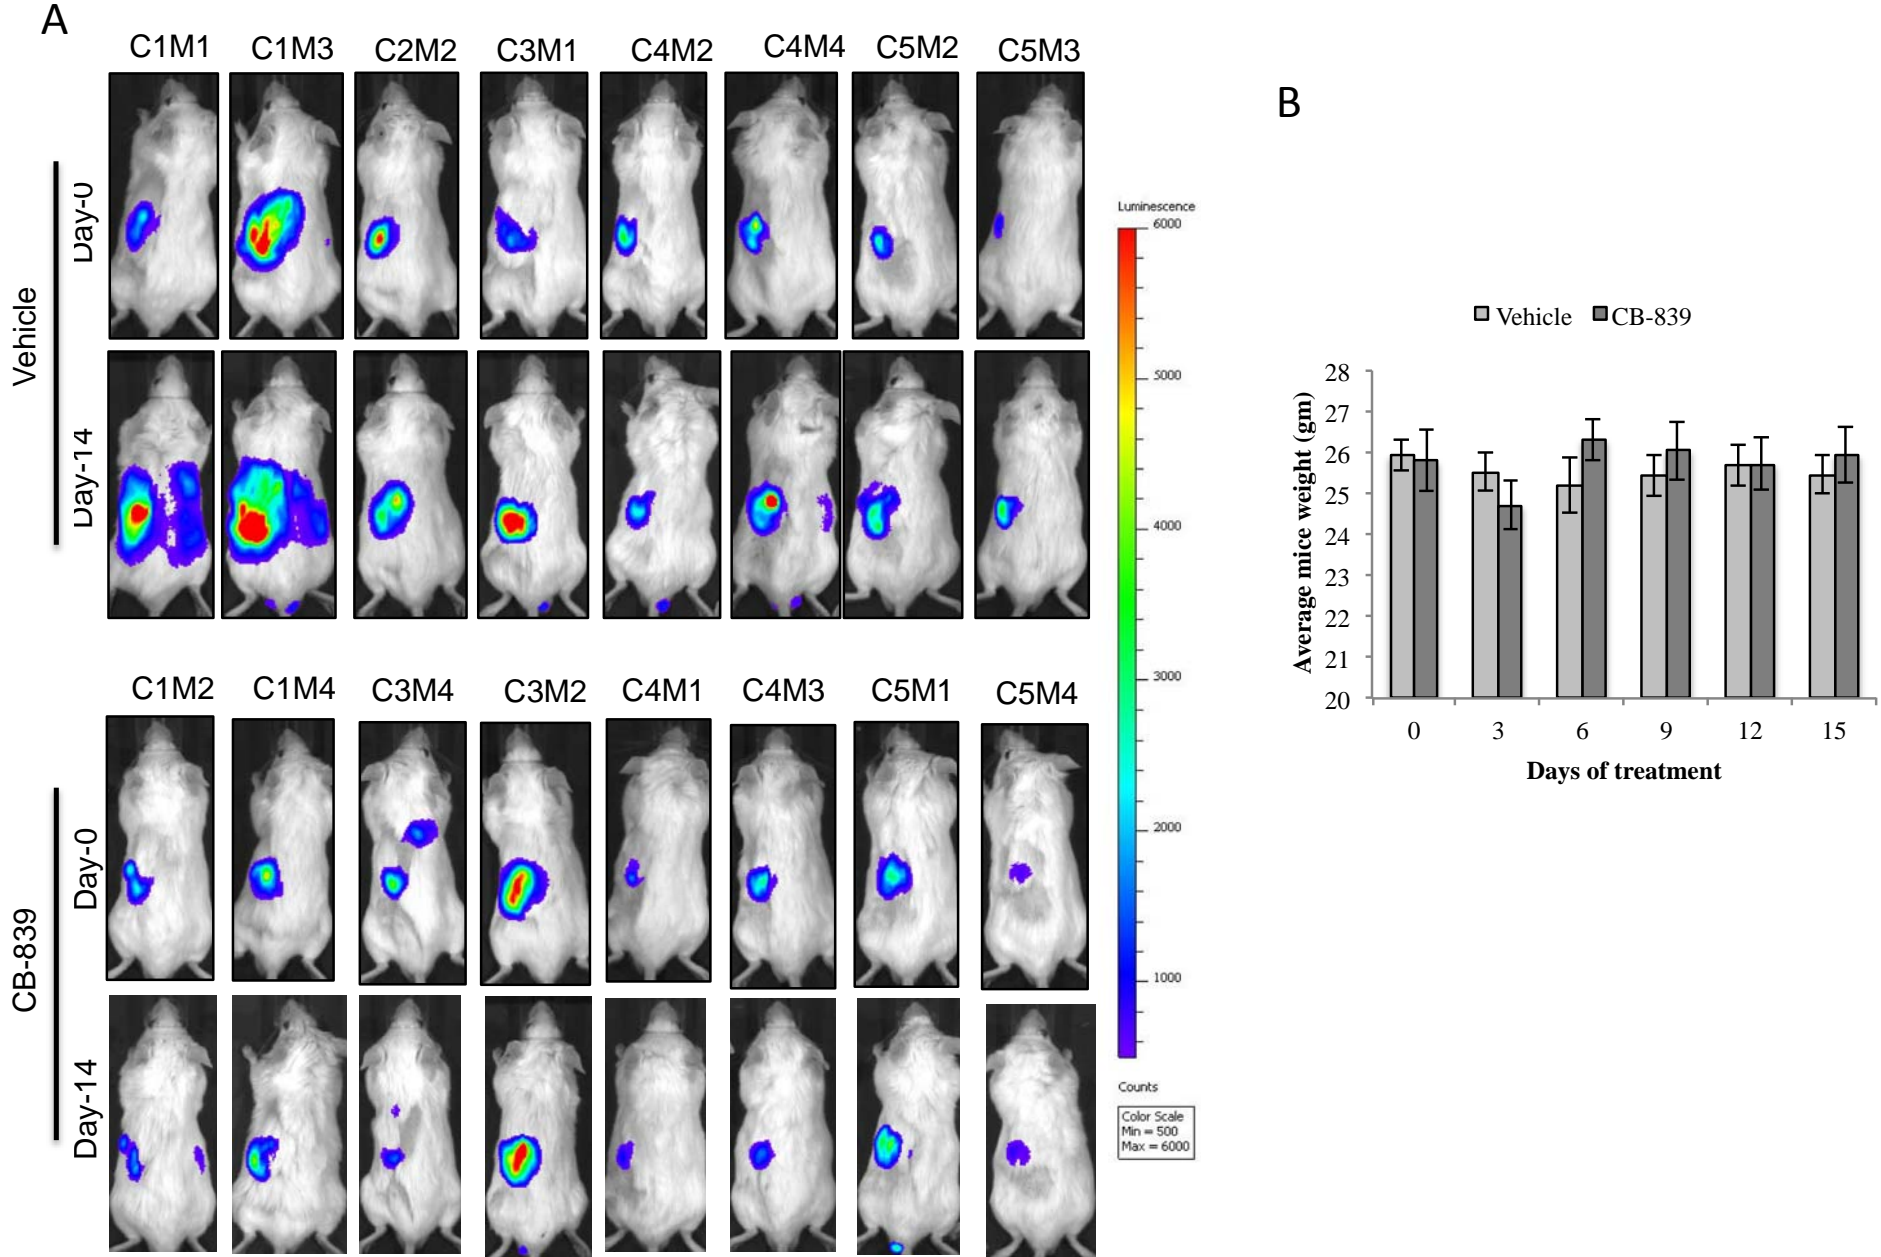

Supplement: NIHMS911884-supplement-4.pdf [file NIHMS911884-supplement-4.pdf]

Supplementary Fig.5: Coronal PET MIP images overlaid with CT images.

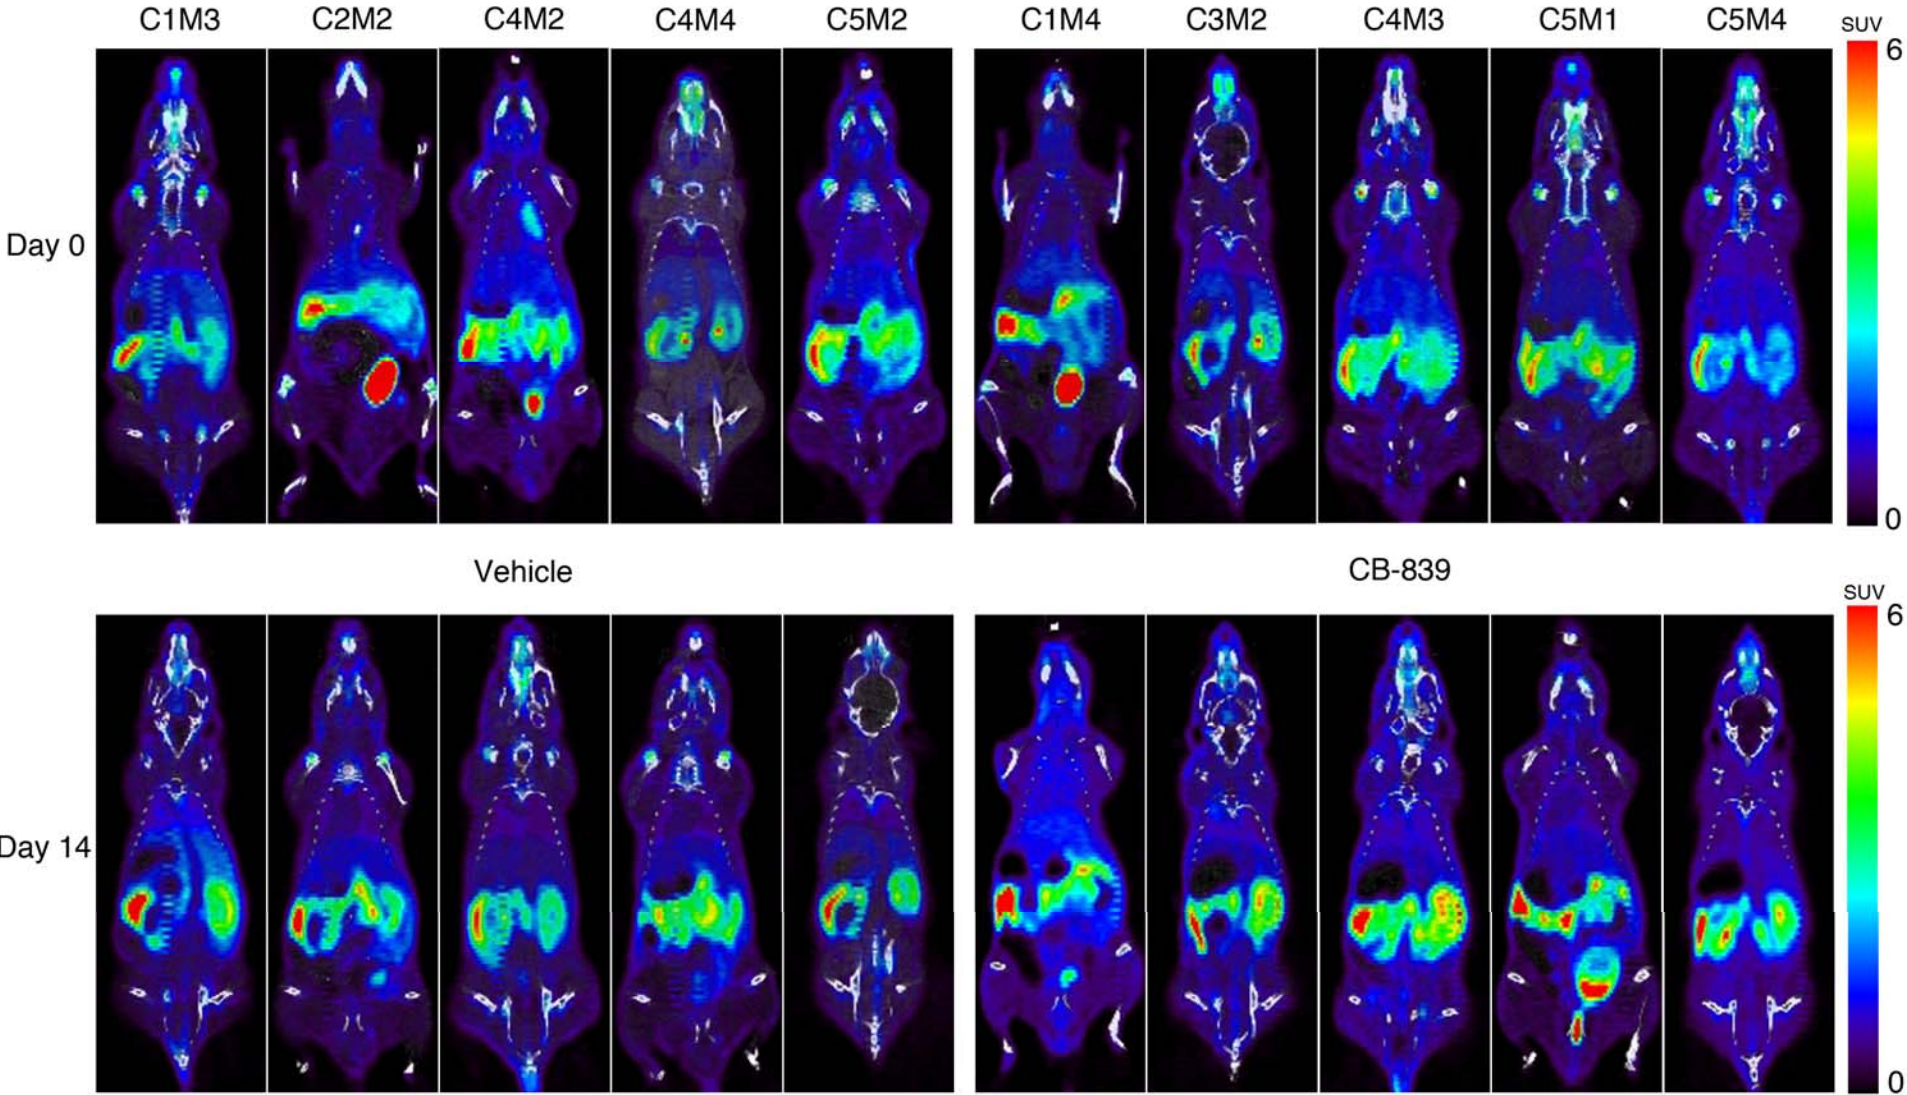

Supplement: NIHMS911884-supplement-5.pdf [file NIHMS911884-supplement-5.pdf]
